# Supplementary material for: Heterogeneous reactions of surface-adsorbed catechol with nitrogen dioxide: substrate effects for tropospheric aerosol surrogates
Source: Royal Society of Chemistry journal article supplement (doi:10.1039/c002079f), 2010-01-01
Supplement: c002079f.pdf [file c002079f.pdf]

Supplemental Information  
**Heterogeneous reactions of surface-adsorbed catechol with nitrogen dioxide:  
substrate effects for tropospheric aerosol surrogates.**

Laurie A. Woodill, Ryan Z. Hinrichs\*

Department of Chemistry, Drew University, Madison, NJ 07940 (rhinrich@drew.edu)

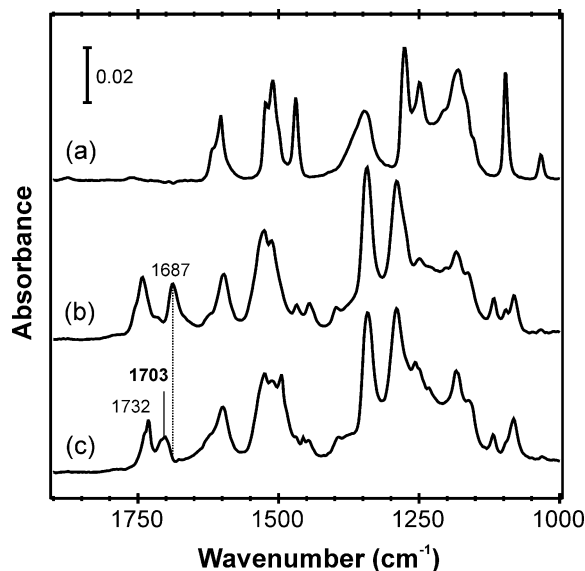

**Figure SI-1.** Isotope experiment using H<sub>2</sub><sup>18</sup>O. (a) Spectrum of NaBr-adsorbed catechol (i.e.,  $t = 0$  minutes). (b) Spectrum of NaBr adsorbed products after exposure to NO<sub>2</sub> at RH < 2%. (c) Spectrum of NaBr-adsorbed products after stopping NO<sub>2</sub> flow, then exposing sample to H<sub>2</sub><sup>18</sup>O. In this Figure, the 1687 cm<sup>-1</sup> peak in (b), corresponding to 1,2-BQ, disappears concurrent with the formation of two peaks in (c) at 1732 and 1703 cm<sup>-1</sup>, which are assigned to C=<sup>16</sup>O and C=<sup>18</sup>O stretching vibrations for MA. These results demonstrate the incorporation of water with 1,2-BQ eventually forming MA.

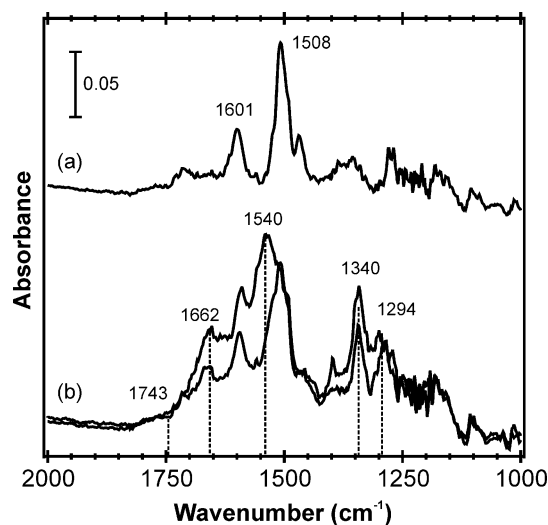

**Figure SI-2.** (a) Spectrum of kaolinite-adsorbed catechol at RH < 2%. Strong kaolinite lattice vibrations absorb IR radiation below 1280 cm<sup>-1</sup> obscuring vibrations for adsorbed species. (b) Spectra of adsorbed products recorded at  $t = 40$  and 160 minutes for the reaction of kaolinite-adsorbed catechol + 101 ppb NO<sub>2</sub> at RH < 2%. Dominant product peaks correspond to 4-NC, while a minor shoulder at 1662 cm<sup>-1</sup> is attributed to 1,2-BQ. The absence of a peak at 1743 cm<sup>-1</sup> suggests very little MA.

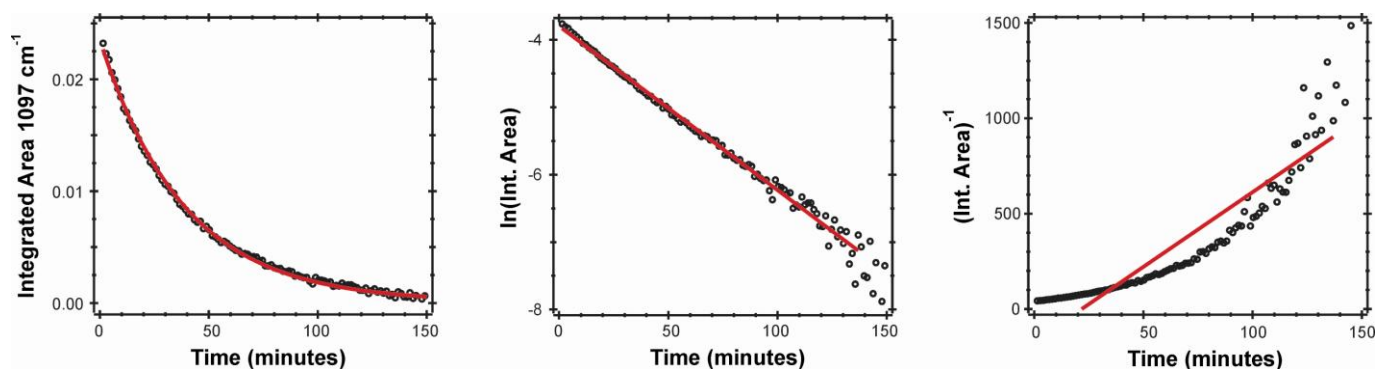

**Figure SI-3.** Integrated rate law plots for the decay of NaCl-adsorbed catechol, monitored by the integrated area of the peak at  $1097\text{ cm}^{-1}$  (circles), for the reaction with  $80\text{ ppb NO}_2$  at  $\text{RH} < 2\%$ . Red lines show exponential (left) and linear (middle, right) fits to the data indicating first-order reaction with respect to surface-adsorbed catechol.

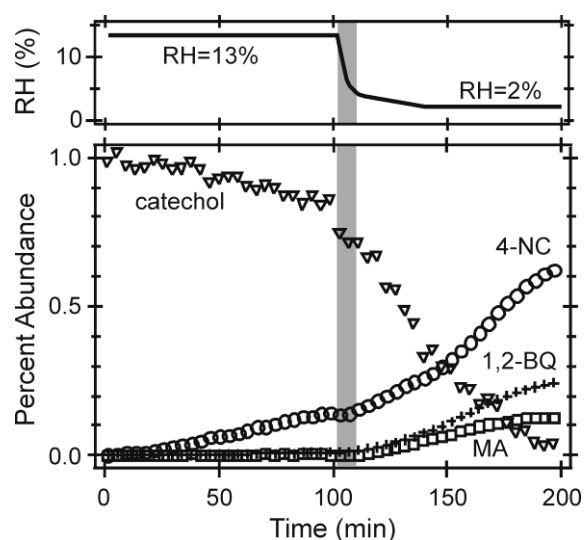

**Figure SI-4.** Percent abundance as a function of time and RH for NaBr-adsorbed catechol +  $80\text{ ppb NO}_2$ . (See text for discussion about product yield determinations.) Increasing RH caused the rate of 4-NC formation to decrease by a factor of three. Adsorbed water further hindered the hydrogen atom transfer necessary for 1,2-BQ and MA formation, causing a more significant decrease in their formation rates.
